# Supplementary material
Source: PubMed Central journal article supplement (PMC7537079)
Supplement: JGS-68-2454-s001.pdf [file JGS-68-2454-s001.pdf]

## Supplements

**Supplementary Table S1.** Characteristics of nursing homes included in our study sample (n=12,576) and nursing homes excluded from the study (n=3,281)\*

|                                                      | Nursing homes included in the study sample (n=12,576) | Nursing homes excluded from the study (n=3,281) | p-value |
|------------------------------------------------------|-------------------------------------------------------|-------------------------------------------------|---------|
|                                                      | Mean±SD or N (%)                                      |                                                 |         |
| <b>Nursing home characteristic</b>                   |                                                       |                                                 |         |
| Percentage of racial/ethnic minority residents, %    | 19.7±21.7                                             | 22.8±23.8**                                     | <.001   |
| Total number of beds                                 | 108.2±59.2                                            | 92.3±58.5                                       | <.001   |
| Number of residents                                  | 88.9±52.8                                             | 72.8±50.7                                       | <.001   |
| Ownership                                            |                                                       |                                                 |         |
| For-profit                                           | 8,861 (70.5)                                          | 2415 (73.6)                                     | <.001   |
| Non-profit                                           | 2,938 (23.4)                                          | 657 (20.0)                                      | <.001   |
| Government owned                                     | 777 (6.2)                                             | 209 (6.4)                                       | 0.686   |
| Chain affiliated                                     | 7,490 (59.6)                                          | 1221 (51.3)                                     | <.001   |
| Hospital affiliated                                  | 398 (3.2)                                             | 237 (8.5)                                       | <.001   |
| Percentage of Medicaid residents, %                  | 60.1±22.1                                             | 58.2±29.6                                       | .0025   |
| Percentage of Medicare residents, %                  | 13.4±12.0                                             | 16.7±21.4                                       | <.001   |
| Case mix index score                                 | 1.3±0.1                                               | 1.3±0.3                                         | <.001   |
| RN hours per resident day                            | 0.7±0.4                                               | 0.8±0.7                                         | <.001   |
| Total nurse hours per resident day                   | 3.8±0.8                                               | 4.1±1.2                                         | <.001   |
| Overall five-star rating                             | 3.1±1.4                                               | 3.2±1.5                                         | .011    |
| <b>County characteristic</b>                         |                                                       |                                                 |         |
| Total # of Covid-19 cases as of May 31, x1k          | 5.0±14.3                                              | 7.8±17.1                                        | <.001   |
| Total # of Covid-19 deaths as of May 31, x1k         | 0.3±0.9                                               | 0.4±1.0                                         | <.001   |
| Total populationx100k                                | 7.7±16.8                                              | 10.8±20.6                                       | <.001   |
| Percentage population ≥65 years, %                   | 16.9±4.0                                              | 15.8±3.8                                        | <.001   |
| Medium household income x \$1k                       | 56.4±15.0                                             | 57.2±14.8                                       | .0123   |
| Percentage population with high school graduation, % | 87.5±5.3                                              | 86.9±6.1                                        | <.001   |
| Market competition for nursing home care             | 78.9±24.8                                             | 82.7±23.1                                       | <.001   |

\* Nursing homes were excluded because they did not report COVID-19 data for the week ending May 31, did not pass CMS' quality assurance check for reported data, or had missing information on the composition of racial/ethnic minority residents.

\*\*for excluded nursing homes that did not have missing information on the composition of racial/ethnic minority residents.

**Supplementary Table S2.** Full model results – 2-part model for weekly number of new COVID-19 confirmed cases among nursing home residents

(Std. Err. adjusted for clustering on County\_name)

| weekly_case_res | Coef.     | Robust Std. Err. | z     | P> z  | [95% Conf. Interval] |           |
|-----------------|-----------|------------------|-------|-------|----------------------|-----------|
| logit           |           |                  |       |       |                      |           |
| qrt2_minority   | .2213206  | .0984573         | 2.25  | 0.025 | .0283477             | .4142934  |
| qrt3_minority   | .3658721  | .1177676         | 3.11  | 0.002 | .1350519             | .5966924  |
| qrt4_minority   | .5654761  | .1245822         | 4.54  | 0.000 | .3212994             | .8096528  |
| beds            | .0026087  | .0012836         | 2.03  | 0.042 | .0000929             | .0051245  |
| num_resident    | .0060582  | .0015161         | 4.00  | 0.000 | .0030866             | .0090298  |
| nfp             | -.0449905 | .0853616         | -0.53 | 0.598 | -.2122961            | .1223151  |
| gov             | -.5796669 | .1934185         | -3.00 | 0.003 | -.9587601            | -.2005736 |
| chain           | .0174332  | .0615713         | 0.28  | 0.777 | -.1032443            | .1381107  |
| _Ihospbase_2    | -.5271379 | .3005016         | -1.75 | 0.079 | -1.11611             | .0618345  |
| pctmcaid        | -.002322  | .0017195         | -1.35 | 0.177 | -.0056921            | .0010481  |
| pctmcare        | -.000606  | .0033375         | -0.18 | 0.856 | -.0071473            | .0059354  |
| avg_casemix     | .2975679  | .1952161         | 1.52  | 0.127 | -.0850486            | .6801845  |
| rn_hprd         | -.2990704 | .1353121         | -2.21 | 0.027 | -.5642772            | -.0338637 |
| total_hprd      | .0069004  | .0597412         | 0.12  | 0.908 | -.1101901            | .1239909  |
| overall         | .0022556  | .0256067         | 0.09  | 0.930 | -.0479325            | .0524438  |
| cnty_casek_nonh | .0003797  | .0022658         | 0.17  | 0.867 | -.0040612            | .0048206  |
| tot_pop_100k    | .0179759  | .003058          | 5.88  | 0.000 | .0119824             | .0239694  |
| pct_65          | -.0206646 | .0157286         | -1.31 | 0.189 | -.0514921            | .0101629  |
| med_inc_k       | .0202784  | .0037182         | 5.45  | 0.000 | .0129909             | .0275659  |
| pct_hs          | -.0435531 | .0112896         | -3.86 | 0.000 | -.0656802            | -.0214259 |
| competition     | .0066541  | .0025222         | 2.64  | 0.008 | .0017107             | .0115974  |
| _Istate_2       | -.9788983 | .4040475         | -2.42 | 0.015 | -1.770817            | -.1869798 |
| _Istate_3       | -.8613454 | .5083384         | -1.69 | 0.090 | -1.85767             | .1349796  |
| _Istate_4       | -1.958717 | .3377471         | -5.80 | 0.000 | -2.620689            | -1.296745 |
| _Istate_5       | -.1287857 | .3278325         | -0.39 | 0.694 | -.7713255            | .5137542  |
| _Istate_6       | .2268831  | .3222338         | 0.70  | 0.481 | -.4046835            | .8584498  |
| _Istate_7       | 1.14984   | .2570111         | 4.47  | 0.000 | .6461072             | 1.653572  |
| _Istate_8       | -.8065602 | .3018725         | -2.67 | 0.008 | -1.39822             | -.214901  |
| _Istate_9       | -.1537593 | .2746533         | -0.56 | 0.576 | -.6920699            | .3845514  |
| _Istate_10      | 0         | (omitted)        |       |       |                      |           |
| _Istate_11      | -.330248  | .3669446         | -0.90 | 0.368 | -1.049446            | .3889501  |
| _Istate_12      | -1.516512 | 1.015299         | -1.49 | 0.135 | -3.506461            | .4734364  |
| _Istate_13      | -.1321808 | .267704          | -0.49 | 0.621 | -.656871             | .3925095  |
| _Istate_14      | -.2774598 | .3051511         | -0.91 | 0.363 | -.875545             | .3206254  |
| _Istate_15      | -2.806477 | .8392788         | -3.34 | 0.001 | -4.451433            | -1.16152  |
| _Istate_16      | -.0025577 | .3227159         | -0.01 | 0.994 | -.6350692            | .6299539  |
| _Istate_17      | .2588075  | .2799184         | 0.92  | 0.355 | -.2898225            | .8074375  |
| _Istate_18      | .2316504  | .2808183         | 0.82  | 0.409 | -.3187433            | .7820441  |
| _Istate_19      | .296535   | .3000929         | 0.99  | 0.323 | -.2916362            | .8847062  |
| _Istate_20      | -1.143453 | .8082194         | -1.41 | 0.157 | -2.727534            | .4406277  |
| _Istate_21      | .1090953  | .2892595         | 0.38  | 0.706 | -.4578429            | .6760336  |
| _Istate_22      | .1856685  | .3442901         | 0.54  | 0.590 | -.4891277            | .8604647  |
| _Istate_23      | -.7477059 | .352466          | -2.12 | 0.034 | -1.438526            | -.0568853 |
| _Istate_24      | .3282738  | .2981625         | 1.10  | 0.271 | -.256114             | .9126616  |
| _Istate_25      | 0         | (omitted)        |       |       |                      |           |
| _Istate_26      | -.6941738 | .3059534         | -2.27 | 0.023 | -1.293832            | -.094516  |
| _Istate_27      | -.2458747 | .775875          | -0.32 | 0.751 | -1.766562            | 1.274812  |
| _Istate_28      | -.1841406 | .3566514         | -0.52 | 0.606 | -.8831645            | .5148833  |
| _Istate_29      | .3832696  | .4689443         | 0.82  | 0.414 | -.5358444            | 1.302384  |
| _Istate_30      | 1.000121  | .2843244         | 3.52  | 0.000 | .442855              | 1.557386  |
| _Istate_31      | -.8224137 | .4720351         | -1.74 | 0.081 | -1.747585            | .102758   |
| _Istate_32      | -1.150104 | .3298866         | -3.49 | 0.000 | -1.79667             | -.503538  |
| _Istate_33      | -.2336047 | .272288          | -0.86 | 0.391 | -.7672794            | .30007    |
| _Istate_34      | -.1947725 | .2694948         | -0.72 | 0.470 | -.7229726            | .3334277  |
| _Istate_35      | -1.764861 | .4215029         | -4.19 | 0.000 | -2.590992            | -.9387305 |

|                 |           |           |       |       |           |           |
|-----------------|-----------|-----------|-------|-------|-----------|-----------|
| _Istate_36      | -2.537319 | 1.088917  | -2.33 | 0.020 | -4.671556 | -.4030813 |
| _Istate_37      | .0498111  | .2607306  | 0.19  | 0.848 | -.4612115 | .5608336  |
| _Istate_38      | .0523173  | .3047229  | 0.17  | 0.864 | -.5449286 | .6495632  |
| _Istate_39      | -.2578799 | .3040581  | -0.85 | 0.396 | -.8538229 | .3380631  |
| _Istate_40      | -.547085  | .5113592  | -1.07 | 0.285 | -1.549331 | .4551607  |
| _Istate_41      | -1.499719 | .3851333  | -3.89 | 0.000 | -2.254566 | -.7448712 |
| _Istate_42      | -1.318528 | .2617646  | -5.04 | 0.000 | -1.831577 | -.8054786 |
| _Istate_43      | -.8714994 | .4144638  | -2.10 | 0.035 | -1.683834 | -.0591652 |
| _Istate_44      | -.4651832 | .3319073  | -1.40 | 0.161 | -1.115709 | .1853431  |
| _Istate_45      | 0         | (omitted) |       |       |           |           |
| _Istate_46      | -.9222316 | .4002842  | -2.30 | 0.021 | -1.706774 | -.1376889 |
| _Istate_47      | -.3387897 | .3440293  | -0.98 | 0.325 | -1.013075 | .3354953  |
| _Istate_48      | 0         | (omitted) |       |       |           |           |
| _Istate_49      | -.4529145 | 1.126168  | -0.40 | 0.688 | -2.660163 | 1.754334  |
| _cons           | -.4762874 | .968046   | -0.49 | 0.623 | -2.373623 | 1.421048  |
| -----           |           |           |       |       |           |           |
| glm             |           |           |       |       |           |           |
| qrt2_minority   | -.0612514 | .1522909  | -0.40 | 0.688 | -.3597362 | .2372333  |
| qrt3_minority   | -.0527761 | .1575098  | -0.34 | 0.738 | -.3614897 | .2559374  |
| qrt4_minority   | .1181105  | .1441819  | 0.82  | 0.413 | -.1644808 | .4007018  |
| beds            | .003234   | .0029899  | 1.08  | 0.279 | -.0026262 | .0090941  |
| num_resident    | -.0059718 | .003296   | -1.81 | 0.070 | -.012432  | .0004883  |
| nfp             | .101428   | .1485675  | 0.68  | 0.495 | -.189759  | .3926149  |
| gov             | .2614088  | .2568038  | 1.02  | 0.309 | -.2419174 | .764735   |
| chain           | -.0450957 | .0841999  | -0.54 | 0.592 | -.2101244 | .1199331  |
| _Ihosbase_2     | -.8370123 | .3425457  | -2.44 | 0.015 | -1.50839  | -.165635  |
| pctmcaid        | .0027409  | .0026608  | 1.03  | 0.303 | -.0024743 | .007956   |
| pctmcare        | .0005007  | .006015   | 0.08  | 0.934 | -.0112885 | .0122899  |
| avg_casemix     | .2099613  | .3972136  | 0.53  | 0.597 | -.568563  | .9884857  |
| rn_hprd         | -.1525482 | .2141713  | -0.71 | 0.476 | -.5723162 | .2672198  |
| total_hprd      | -.1799898 | .0975091  | -1.85 | 0.065 | -.3711041 | .0111245  |
| overall         | .0132529  | .0337928  | 0.39  | 0.695 | -.0529796 | .0794855  |
| cnty_casek_nonh | .0017104  | .0014174  | 1.21  | 0.228 | -.0010676 | .0044885  |
| tot_pop_100k    | -.0044858 | .0027551  | -1.63 | 0.103 | -.0098858 | .0009142  |
| pct_65          | -.0166261 | .0163846  | -1.01 | 0.310 | -.0487395 | .0154872  |
| med_inc_k       | -.005238  | .0044694  | -1.17 | 0.241 | -.0139978 | .0035218  |
| pct_hs          | -.0213743 | .0155773  | -1.37 | 0.170 | -.0519052 | .0091566  |
| competition     | -.0045086 | .0027876  | -1.62 | 0.106 | -.0099721 | .0009549  |
| _Istate_2       | -.2917585 | .4495948  | -0.65 | 0.516 | -1.172948 | .5894311  |
| _Istate_3       | .4617146  | .519272   | 0.89  | 0.374 | -.5560398 | 1.479469  |
| _Istate_4       | .5981467  | .3844073  | 1.56  | 0.120 | -.1552777 | 1.351571  |
| _Istate_5       | .345467   | .3747323  | 0.92  | 0.357 | -.3889949 | 1.079929  |
| _Istate_6       | 1.499331  | .5177029  | 2.90  | 0.004 | .4846523  | 2.51401   |
| _Istate_7       | .7118453  | .3958215  | 1.80  | 0.072 | -.0639506 | 1.487641  |
| _Istate_8       | .0580845  | .3453546  | 0.17  | 0.866 | -.6187981 | .7349671  |
| _Istate_9       | -.2433219 | .3597657  | -0.68 | 0.499 | -.9484498 | .461806   |
| _Istate_10      | 0         | (omitted) |       |       |           |           |
| _Istate_11      | .8136584  | .552485   | 1.47  | 0.141 | -.2691923 | 1.896509  |
| _Istate_12      | -.1484332 | .3717643  | -0.40 | 0.690 | -.8770778 | .5802115  |
| _Istate_13      | .3827408  | .3647473  | 1.05  | 0.294 | -.3321509 | 1.097632  |
| _Istate_14      | -.2519406 | .386753   | -0.65 | 0.515 | -1.009963 | .5060813  |
| _Istate_15      | 1.073359  | .3520761  | 3.05  | 0.002 | .3833027  | 1.763416  |
| _Istate_16      | .5030454  | .3468825  | 1.45  | 0.147 | -.1768318 | 1.182923  |
| _Istate_17      | .3422448  | .3495329  | 0.98  | 0.328 | -.3428271 | 1.027317  |
| _Istate_18      | .5343118  | .3436351  | 1.55  | 0.120 | -.1392006 | 1.207824  |
| _Istate_19      | .8505738  | .3953381  | 2.15  | 0.031 | .0757252  | 1.625422  |
| _Istate_20      | .3872081  | .3101028  | 1.25  | 0.212 | -.2205822 | .9949984  |
| _Istate_21      | 1.246042  | .3366981  | 3.70  | 0.000 | .5861254  | 1.905958  |
| _Istate_22      | 1.093204  | .3458235  | 3.16  | 0.002 | .4154029  | 1.771006  |
| _Istate_23      | .6969301  | .3750326  | 1.86  | 0.063 | -.0381203 | 1.431981  |
| _Istate_24      | .6726143  | .3602906  | 1.87  | 0.062 | -.0335424 | 1.378771  |

|            |           |           |       |       |           |           |
|------------|-----------|-----------|-------|-------|-----------|-----------|
| _Istate_25 | 0         | (omitted) |       |       |           |           |
| _Istate_26 | .5396696  | .3585811  | 1.51  | 0.132 | -.1631364 | 1.242476  |
| _Istate_27 | .1760627  | .3597475  | 0.49  | 0.625 | -.5290294 | .8811548  |
| _Istate_28 | -.3948647 | .3608473  | -1.09 | 0.274 | -1.102112 | .312383   |
| _Istate_29 | 1.198922  | .4248933  | 2.82  | 0.005 | .3661464  | 2.031698  |
| _Istate_30 | .774899   | .3778309  | 2.05  | 0.040 | .0343641  | 1.515434  |
| _Istate_31 | .2729192  | .4773683  | 0.57  | 0.568 | -.6627055 | 1.208544  |
| _Istate_32 | .6274803  | .3129552  | 2.01  | 0.045 | .0140994  | 1.240861  |
| _Istate_33 | .5968087  | .3807297  | 1.57  | 0.117 | -.1494079 | 1.343025  |
| _Istate_34 | .5085409  | .3504175  | 1.45  | 0.147 | -.1782647 | 1.195347  |
| _Istate_35 | -.0613406 | .5408175  | -0.11 | 0.910 | -1.121323 | .9986422  |
| _Istate_36 | -1.173424 | .3257427  | -3.60 | 0.000 | -1.811868 | -.5349796 |
| _Istate_37 | .7816934  | .4515916  | 1.73  | 0.083 | -.1034098 | 1.666797  |
| _Istate_38 | .6794831  | .3396955  | 2.00  | 0.045 | .0136921  | 1.345274  |
| _Istate_39 | .4452588  | .3199838  | 1.39  | 0.164 | -.1818979 | 1.072415  |
| _Istate_40 | .1036501  | .4310884  | 0.24  | 0.810 | -.7412677 | .9485679  |
| _Istate_41 | .3281753  | .404516   | 0.81  | 0.417 | -.4646614 | 1.121012  |
| _Istate_42 | .1742519  | .3819573  | 0.46  | 0.648 | -.5743705 | .9228744  |
| _Istate_43 | 1.852609  | .4751041  | 3.90  | 0.000 | .921422   | 2.783796  |
| _Istate_44 | .0188949  | .3458715  | 0.05  | 0.956 | -.6590007 | .6967906  |
| _Istate_45 | 0         | (omitted) |       |       |           |           |
| _Istate_46 | 1.145621  | .4722964  | 2.43  | 0.015 | .2199369  | 2.071305  |
| _Istate_47 | .3779739  | .3669545  | 1.03  | 0.303 | -.3412437 | 1.097192  |
| _Istate_48 | 0         | (omitted) |       |       |           |           |
| _Istate_49 | .5484366  | .3574142  | 1.53  | 0.125 | -.1520824 | 1.248956  |
| _cons      | -.0870253 | 1.337267  | -0.07 | 0.948 | -2.70802  | 2.533969  |

#### Variable labels:

|                 |                                                                     |
|-----------------|---------------------------------------------------------------------|
| qrt2_minority   | NH with medium proportion of racial/ethnic minority residents (1/0) |
| qrt3_minority   | NH with medium-high prop. of racial/ethnic minority residents (1/0) |
| qrt4_minority   | NH with high proportion of racial/ethnic minority residents (1/0)   |
| beds            | # of certified beds                                                 |
| num_resident    | average daily resident census                                       |
| nfp             | non-profit (1/0)                                                    |
| gov             | government owned (1/0)                                              |
| chain           | chain affiliation (1/0)                                             |
| _lhospbase_2    | hospital affiliated (1/0)                                           |
| Pctmcaid        | % of Medicaid residents in the NH                                   |
| Pctmcare        | % of Medicare residents in the NH                                   |
| avg_casemix     | NH case mix index                                                   |
| rn_hprd         | RN staffing hrs/resident day                                        |
| total_hprd      | total nurse hrs/resident day (RN+LPN/LVN+CNA)                       |
| overall         | 5-star rating for overall quality of care                           |
| cnty_casek_nonh | county number of COVID-19 cases as of May 31                        |
| tot_pop_100k    | county population size in 100k                                      |
| pct_65          | county % of older population (65+)                                  |
| med_inc_k       | county median household income in \$1000                            |
| pct_hs          | county % of population with high school graduation                  |
| competition     | county-level competition for nursing home residents                 |
| _Istate_#       | indicators for states                                               |

**Supplementary Table S3. Full model results – 2-part model for weekly number of new COVID-19 related deaths among nursing home residents**

(Std. Err. adjusted for clustering on County\_name)

| weekly_covdeat~s | Coef.     | Robust Std. Err. | z     | P> z  | [95% Conf. Interval] |           |
|------------------|-----------|------------------|-------|-------|----------------------|-----------|
| <b>logit</b>     |           |                  |       |       |                      |           |
| qrt2_minority    | .2519161  | .1079376         | 2.33  | 0.020 | .0403622             | .4634699  |
| qrt3_minority    | .3592293  | .1236301         | 2.91  | 0.004 | .1169188             | .6015398  |
| qrt4_minority    | .4405758  | .1323808         | 3.33  | 0.001 | .1811141             | .7000375  |
| beds             | .0027959  | .0013953         | 2.00  | 0.045 | .0000612             | .0055306  |
| num_resident     | .0052476  | .0016575         | 3.17  | 0.002 | .0019989             | .0084963  |
| nfp              | -.0257405 | .1053754         | -0.24 | 0.807 | -.2322724            | .1807915  |
| gov              | -.088166  | .1963233         | -0.45 | 0.653 | -.4729526            | .2966205  |
| chain            | .0640335  | .0689244         | 0.93  | 0.353 | -.0710559            | .1991229  |
| _Ihosbase_2      | -.4902453 | .3478825         | -1.41 | 0.159 | -1.172082            | .1915919  |
| pctmcaid         | -.0030277 | .0019177         | -1.58 | 0.114 | -.0067863            | .0007309  |
| pctmcare         | .0007055  | .0033573         | 0.21  | 0.834 | -.0058746            | .0072857  |
| avg_casemix      | .3623389  | .1701349         | 2.13  | 0.033 | .0288806             | .6957972  |
| rn_hprd          | -.3477345 | .1640133         | -2.12 | 0.034 | -.6691946            | -.0262745 |
| total_hprd       | -.0946535 | .0705583         | -1.34 | 0.180 | -.2329452            | .0436382  |
| overall          | .0032675  | .0290489         | 0.11  | 0.913 | -.0552353            | .0617703  |
| cnty_deathk_nonh | -.1219071 | .0225478         | -5.41 | 0.000 | -.1661               | -.0777142 |
| tot_pop_100k     | .0225334  | .0029416         | 7.66  | 0.000 | .0167679             | .0282989  |
| pct_65           | -.0249703 | .0177323         | -1.41 | 0.159 | -.059725             | .0097844  |
| med_inc_k        | .0196789  | .0045434         | 4.33  | 0.000 | .010774              | .0285838  |
| pct_hs           | -.0489881 | .0125454         | -3.90 | 0.000 | -.0735766            | -.0243995 |
| competition      | .0077047  | .0033737         | 2.28  | 0.022 | .0010924             | .0143169  |
| _Istate_2        | -.8768177 | .5737434         | -1.53 | 0.126 | -2.001334            | .2476987  |
| _Istate_3        | -.8804116 | .3965361         | -2.22 | 0.026 | -1.657608            | -.103215  |
| _Istate_4        | -1.738803 | .4279447         | -4.06 | 0.000 | -2.57756             | -.9000471 |
| _Istate_5        | .0563966  | .4475053         | 0.13  | 0.900 | -.8206976            | .9334908  |
| _Istate_6        | 1.43927   | .3524764         | 4.08  | 0.000 | .7484292             | 2.130111  |
| _Istate_7        | 2.011698  | .3780657         | 5.32  | 0.000 | 1.270703             | 2.752693  |
| _Istate_8        | -.1989408 | .4084913         | -0.49 | 0.626 | -.9995691            | .6016875  |
| _Istate_9        | .4214599  | .3903974         | 1.08  | 0.280 | -.343705             | 1.186625  |
| _Istate_10       | 0         | (omitted)        |       |       |                      |           |
| _Istate_11       | -.173241  | .5532263         | -0.31 | 0.754 | -1.257545            | .9110627  |
| _Istate_12       | -.642243  | 1.045132         | -0.61 | 0.539 | -2.690664            | 1.406178  |
| _Istate_13       | .4481444  | .3601616         | 1.24  | 0.213 | -.2577592            | 1.154048  |
| _Istate_14       | .4353067  | .4053887         | 1.07  | 0.283 | -.3592406            | 1.229854  |
| _Istate_15       | -1.910617 | .8879502         | -2.15 | 0.031 | -3.650967            | -.1702667 |
| _Istate_16       | -.1390804 | .4539398         | -0.31 | 0.759 | -1.028786            | .7506253  |
| _Istate_17       | .8554098  | .3800023         | 2.25  | 0.024 | .1106189             | 1.600201  |
| _Istate_18       | 1.527728  | .3787923         | 4.03  | 0.000 | .7853084             | 2.270147  |
| _Istate_19       | .8346513  | .434625          | 1.92  | 0.055 | -.0171981            | 1.686501  |
| _Istate_20       | -.1784771 | .8482184         | -0.21 | 0.833 | -1.840955            | 1.484     |
| _Istate_21       | .8303051  | .3670882         | 2.26  | 0.024 | .1108255             | 1.549785  |
| _Istate_22       | .9920963  | .5078899         | 1.95  | 0.051 | -.0033496            | 1.987542  |
| _Istate_23       | -.3925354 | .5382607         | -0.73 | 0.466 | -1.447507            | .6624362  |
| _Istate_24       | 1.099673  | .4287548         | 2.56  | 0.010 | .2593291             | 1.940017  |
| _Istate_25       | 0         | (omitted)        |       |       |                      |           |
| _Istate_26       | -.3446544 | .3921433         | -0.88 | 0.379 | -1.113241            | .4239324  |
| _Istate_27       | .4799537  | .9922622         | 0.48  | 0.629 | -1.464845            | 2.424752  |
| _Istate_28       | -.3866637 | .5347059         | -0.72 | 0.470 | -1.434668            | .6613405  |
| _Istate_29       | .52837    | .6470891         | 0.82  | 0.414 | -.7399013            | 1.796641  |
| _Istate_30       | 1.275815  | .4031436         | 3.16  | 0.002 | .4856684             | 2.065962  |
| _Istate_31       | -.6466991 | .5804822         | -1.11 | 0.265 | -1.784423            | .4910252  |
| _Istate_32       | -1.085823 | .6465006         | -1.68 | 0.093 | -2.35294             | .1812953  |
| _Istate_33       | .2508399  | .392217          | 0.64  | 0.522 | -.5178913            | 1.019571  |
| _Istate_34       | -.0042681 | .3917308         | -0.01 | 0.991 | -.7720465            | .7635102  |
| _Istate_35       | -.8983341 | .4440752         | -2.02 | 0.043 | -1.768706            | -.0279626 |

|            |           |           |       |       |           |           |
|------------|-----------|-----------|-------|-------|-----------|-----------|
| _Istate_36 | -1.587539 | .9916976  | -1.60 | 0.109 | -3.53123  | .3561528  |
| _Istate_37 | .6817873  | .4097263  | 1.66  | 0.096 | -.1212616 | 1.484836  |
| _Istate_38 | 1.259271  | .4803614  | 2.62  | 0.009 | .31778    | 2.200762  |
| _Istate_39 | -.1826454 | .4401607  | -0.41 | 0.678 | -1.045345 | .6800538  |
| _Istate_40 | -.7583851 | .8831238  | -0.86 | 0.390 | -2.489276 | .9725057  |
| _Istate_41 | -1.605806 | .5291721  | -3.03 | 0.002 | -2.642964 | -.5686473 |
| _Istate_42 | -1.537063 | .4515561  | -3.40 | 0.001 | -2.422097 | -.6520291 |
| _Istate_43 | -1.628416 | 1.115451  | -1.46 | 0.144 | -3.81466  | .5578271  |
| _Istate_44 | .1460788  | .4276504  | 0.34  | 0.733 | -.6921005 | .9842581  |
| _Istate_45 | 0         | (omitted) |       |       |           |           |
| _Istate_46 | -.8135767 | .3886603  | -2.09 | 0.036 | -1.575337 | -.0518165 |
| _Istate_47 | .1343441  | .4846563  | 0.28  | 0.782 | -.8155648 | 1.084253  |
| _Istate_48 | -1.397812 | 1.074137  | -1.30 | 0.193 | -3.503081 | .7074575  |
| _Istate_49 | .3927539  | 1.161904  | 0.34  | 0.735 | -1.884537 | 2.670044  |
| _cons      | -.4958035 | 1.120259  | -0.44 | 0.658 | -2.691471 | 1.699864  |

| -----           |           |           |       |       |           |           |
|-----------------|-----------|-----------|-------|-------|-----------|-----------|
| glm             |           |           |       |       |           |           |
| qrt2_minority   | .0022214  | .1513639  | 0.01  | 0.988 | -.2944465 | .2988892  |
| qrt3_minority   | -.3234491 | .1481648  | -2.18 | 0.029 | -.6138468 | -.0330513 |
| qrt4_minority   | -.2298614 | .1667618  | -1.38 | 0.168 | -.5567085 | .0969857  |
| beds            | .0012032  | .0025373  | 0.47  | 0.635 | -.0037698 | .0061761  |
| num_resident    | -.0056675 | .0028788  | -1.97 | 0.049 | -.0113099 | -.0000252 |
| nfp             | .048217   | .1047104  | 0.46  | 0.645 | -.1570116 | .2534456  |
| gov             | .2536048  | .2569124  | 0.99  | 0.324 | -.2499343 | .7571438  |
| chain           | -.1600324 | .0823489  | -1.94 | 0.052 | -.3214332 | .0013684  |
| _Ihospbase_2    | -.1566808 | .2642826  | -0.59 | 0.553 | -.6746651 | .3613036  |
| pctmcaid        | .0039646  | .0021539  | 1.84  | 0.066 | -.0002569 | .0081862  |
| pctmcare        | .0023076  | .0042633  | 0.54  | 0.588 | -.0060484 | .0106635  |
| avg_casemix     | .6329551  | .7815229  | 0.81  | 0.418 | -.8988016 | 2.164712  |
| rn_hprd         | .0666853  | .1677517  | 0.40  | 0.691 | -.2621019 | .3954726  |
| total_hprd      | -.1515859 | .0873188  | -1.74 | 0.083 | -.3227276 | .0195558  |
| overall         | -.0300026 | .0353392  | -0.85 | 0.396 | -.0992661 | .0392609  |
| cnty_casek_nonh | -.0043072 | .0033082  | -1.30 | 0.193 | -.0107911 | .0021768  |
| tot_pop_100k    | .0066973  | .0028675  | 2.34  | 0.020 | .0010772  | .0123175  |
| pct_65          | -.0177605 | .0135893  | -1.31 | 0.191 | -.0443951 | .0088741  |
| med_inc_k       | -.0024094 | .004313   | -0.56 | 0.576 | -.0108627 | .0060438  |
| pct_hs          | .0082551  | .0174749  | 0.47  | 0.637 | -.025995  | .0425052  |
| competition     | -.0028861 | .0026591  | -1.09 | 0.278 | -.0080978 | .0023256  |
| _Istate_2       | .3642584  | .3893554  | 0.94  | 0.350 | -.3988641 | 1.127381  |
| _Istate_3       | .0458198  | .2493657  | 0.18  | 0.854 | -.4429281 | .5345676  |
| _Istate_4       | .1076105  | .3141333  | 0.34  | 0.732 | -.5080795 | .7233004  |
| _Istate_5       | -.1132841 | .2742096  | -0.41 | 0.680 | -.650725  | .4241568  |
| _Istate_6       | .1038086  | .2438233  | 0.43  | 0.670 | -.3740762 | .5816935  |
| _Istate_7       | .0795828  | .220334   | 0.36  | 0.718 | -.3522639 | .5114296  |
| _Istate_8       | .4571377  | .2639832  | 1.73  | 0.083 | -.0602598 | .9745352  |
| _Istate_9       | .1508217  | .2892768  | 0.52  | 0.602 | -.4161505 | .7177939  |
| _Istate_10      | 0         | (omitted) |       |       |           |           |
| _Istate_11      | .7092903  | .3449124  | 2.06  | 0.040 | .0332743  | 1.385306  |
| _Istate_12      | 1.96187   | .3033851  | 6.47  | 0.000 | 1.367246  | 2.556494  |
| _Istate_13      | -.0863022 | .2656167  | -0.32 | 0.745 | -.6069013 | .434297   |
| _Istate_14      | -.1410865 | .2667528  | -0.53 | 0.597 | -.6639123 | .3817393  |
| _Istate_15      | -.6165485 | .2611895  | -2.36 | 0.018 | -1.12847  | -.1046266 |
| _Istate_16      | .5634339  | .3538039  | 1.59  | 0.111 | -.1300089 | 1.256877  |
| _Istate_17      | .3276608  | .3134242  | 1.05  | 0.296 | -.2866394 | .941961   |
| _Istate_18      | .1971289  | .2482928  | 0.79  | 0.427 | -.2895161 | .6837739  |
| _Istate_19      | .1727114  | .245694   | 0.70  | 0.482 | -.3088401 | .6542628  |
| _Istate_20      | .6067165  | .236676   | 2.56  | 0.010 | .14284    | 1.070593  |
| _Istate_21      | 1.125638  | .3469427  | 3.24  | 0.001 | .4456427  | 1.805633  |
| _Istate_22      | .541372   | .2868404  | 1.89  | 0.059 | -.0208249 | 1.103569  |
| _Istate_23      | .4245588  | .2877147  | 1.48  | 0.140 | -.1393517 | .9884692  |
| _Istate_24      | .6310083  | .3349625  | 1.88  | 0.060 | -.0255061 | 1.287523  |

|            |  |           |           |       |       |           |           |
|------------|--|-----------|-----------|-------|-------|-----------|-----------|
| _Istate_25 |  | 0         | (omitted) |       |       |           |           |
| _Istate_26 |  | .4362028  | .2435864  | 1.79  | 0.073 | -.0412177 | .9136233  |
| _Istate_27 |  | .254548   | .2936791  | 0.87  | 0.386 | -.3210524 | .8301484  |
| _Istate_28 |  | .5031646  | .5027066  | 1.00  | 0.317 | -.4821222 | 1.488451  |
| _Istate_29 |  | .2417123  | .2603994  | 0.93  | 0.353 | -.2686612 | .7520857  |
| _Istate_30 |  | .2456785  | .2616073  | 0.94  | 0.348 | -.2670624 | .7584193  |
| _Istate_31 |  | .9690154  | .8859457  | 1.09  | 0.274 | -.7674062 | 2.705437  |
| _Istate_32 |  | -.9533327 | .263198   | -3.62 | 0.000 | -1.469191 | -.4374741 |
| _Istate_33 |  | .128047   | .2879209  | 0.44  | 0.657 | -.4362675 | .6923616  |
| _Istate_34 |  | .5055536  | .2753454  | 1.84  | 0.066 | -.0341134 | 1.045221  |
| _Istate_35 |  | .1838555  | .5454063  | 0.34  | 0.736 | -.8851211 | 1.252832  |
| _Istate_36 |  | .0984815  | .2866416  | 0.34  | 0.731 | -.4633257 | .6602887  |
| _Istate_37 |  | .3323665  | .2930198  | 1.13  | 0.257 | -.2419418 | .9066748  |
| _Istate_38 |  | .9051359  | .2583095  | 3.50  | 0.000 | .3988585  | 1.411413  |
| _Istate_39 |  | .6949986  | .4049419  | 1.72  | 0.086 | -.098673  | 1.48867   |
| _Istate_40 |  | -.3276599 | .2999922  | -1.09 | 0.275 | -.9156338 | .260314   |
| _Istate_41 |  | .1043283  | .2308978  | 0.45  | 0.651 | -.348223  | .5568797  |
| _Istate_42 |  | .1072035  | .3336496  | 0.32  | 0.748 | -.5467377 | .7611447  |
| _Istate_43 |  | -.1248703 | .4237795  | -0.29 | 0.768 | -.9554628 | .7057222  |
| _Istate_44 |  | .051852   | .2446166  | 0.21  | 0.832 | -.4275877 | .5312918  |
| _Istate_45 |  | 0         | (omitted) |       |       |           |           |
| _Istate_46 |  | .146338   | .4034374  | 0.36  | 0.717 | -.6443847 | .9370607  |
| _Istate_47 |  | .0997345  | .278816   | 0.36  | 0.721 | -.4467348 | .6462038  |
| _Istate_48 |  | -.8692259 | .2555687  | -3.40 | 0.001 | -1.370131 | -.3683203 |
| _Istate_49 |  | -.4925803 | .3225628  | -1.53 | 0.127 | -1.124792 | .1396312  |
| _cons      |  | -3.851014 | 1.803294  | -2.14 | 0.033 | -7.385405 | -.3166221 |

-----

**Supplementary Table S4.** Full model results – 2-part model for weekly number of new COVID-19 confirmed cases among nursing home staff

| (Std. Err. adjusted for clustering on County_name) |           |                     |       |       |                      |           |
|----------------------------------------------------|-----------|---------------------|-------|-------|----------------------|-----------|
| weekly_case_s~f                                    | Coef.     | Robust<br>Std. Err. | z     | P> z  | [95% Conf. Interval] |           |
| logit                                              |           |                     |       |       |                      |           |
| qrt2_minority                                      | .215271   | .0886663            | 2.43  | 0.015 | .0414881             | .3890538  |
| qrt3_minority                                      | .3807505  | .0977916            | 3.89  | 0.000 | .1890824             | .5724186  |
| qrt4_minority                                      | .4987952  | .1182801            | 4.22  | 0.000 | .2669705             | .7306199  |
| beds                                               | .0018158  | .0012863            | 1.41  | 0.158 | -.0007053            | .0043368  |
| num_resident                                       | .0057071  | .0014982            | 3.81  | 0.000 | .0027707             | .0086435  |
| nfp                                                | .0535337  | .0818351            | 0.65  | 0.513 | -.1068602            | .2139276  |
| gov                                                | -.1534493 | .1610462            | -0.95 | 0.341 | -.469094             | .1621954  |
| chain                                              | -.015202  | .0583534            | -0.26 | 0.794 | -.1295726            | .0991686  |
| _Ihosibase_2                                       | .0803232  | .1863412            | 0.43  | 0.666 | -.2848988            | .4455451  |
| pctmcaid                                           | -.0042821 | .0015234            | -2.81 | 0.005 | -.007268             | -.0012962 |
| pctmcare                                           | .0011078  | .0028148            | 0.39  | 0.694 | -.0044091            | .0066248  |
| avg_casemix                                        | .3728081  | .2143257            | 1.74  | 0.082 | -.0472626            | .7928787  |
| rn_hprd                                            | -.0734813 | .1319546            | -0.56 | 0.578 | -.3321077            | .185145   |
| total_hprd                                         | .0760505  | .0549114            | 1.38  | 0.166 | -.0315739            | .1836748  |
| overall                                            | -.0168381 | .0237796            | -0.71 | 0.479 | -.0634454            | .0297691  |
| cnty_casek_nonh                                    | -.0017819 | .0042186            | -0.42 | 0.673 | -.0100502            | .0064864  |
| tot_pop_100k                                       | .0163531  | .003491             | 4.68  | 0.000 | .0095109             | .0231953  |
| pct_65                                             | -.0163694 | .0134074            | -1.22 | 0.222 | -.0426474            | .0099086  |
| med_inc_k                                          | .0199686  | .0035068            | 5.69  | 0.000 | .0130955             | .0268418  |
| pct_hs                                             | -.0504025 | .0112725            | -4.47 | 0.000 | -.0724963            | -.0283088 |
| competition                                        | .0092394  | .0023281            | 3.97  | 0.000 | .0046764             | .0138023  |
| _Istate_2                                          | -.5888821 | .4252085            | -1.38 | 0.166 | -1.422276            | .2445113  |
| _Istate_3                                          | -.5621888 | .4467338            | -1.26 | 0.208 | -1.437771            | .3133934  |
| _Istate_4                                          | -1.759731 | .3149611            | -5.59 | 0.000 | -2.377043            | -1.142418 |
| _Istate_5                                          | -.8811936 | .3696469            | -2.38 | 0.017 | -1.605688            | -.156699  |
| _Istate_6                                          | -.1670427 | .3491388            | -0.48 | 0.632 | -.8513422            | .5172568  |
| _Istate_7                                          | .0986787  | .303021             | 0.33  | 0.745 | -.4952315            | .6925889  |
| _Istate_8                                          | -.5350412 | .3094843            | -1.73 | 0.084 | -1.141619            | .071537   |
| _Istate_9                                          | -.0899713 | .2970994            | -0.30 | 0.762 | -.6722754            | .4923328  |
| _Istate_10                                         | 0         | (omitted)           |       |       |                      |           |
| _Istate_11                                         | -.084819  | .3238352            | -0.26 | 0.793 | -.7195244            | .5498864  |
| _Istate_12                                         | -.1531794 | .5626955            | -0.27 | 0.785 | -1.256042            | .9496835  |
| _Istate_13                                         | -.0212896 | .2945525            | -0.07 | 0.942 | -.5986019            | .5560227  |
| _Istate_14                                         | -.4332916 | .2863358            | -1.51 | 0.130 | -.9944994            | .1279162  |
| _Istate_15                                         | -1.481867 | .6165427            | -2.40 | 0.016 | -2.690269            | -.2734661 |
| _Istate_16                                         | -.2852554 | .374494             | -0.76 | 0.446 | -1.01925             | .4487392  |
| _Istate_17                                         | .2209499  | .3107589            | 0.71  | 0.477 | -.3881265            | .8300262  |
| _Istate_18                                         | .3649856  | .2728119            | 1.34  | 0.181 | -.1697158            | .899687   |
| _Istate_19                                         | .3051589  | .339283             | 0.90  | 0.368 | -.3598236            | .9701415  |
| _Istate_20                                         | -1.123469 | .5132587            | -2.19 | 0.029 | -2.129437            | -.1175    |
| _Istate_21                                         | -.0732969 | .3234914            | -0.23 | 0.821 | -.7073283            | .5607346  |
| _Istate_22                                         | .2281552  | .3607489            | 0.63  | 0.527 | -.4788997            | .93521    |
| _Istate_23                                         | -1.114154 | .4073855            | -2.73 | 0.006 | -1.912615            | -.3156932 |
| _Istate_24                                         | .9178865  | .3152989            | 2.91  | 0.004 | .2999119             | 1.535861  |
| _Istate_25                                         | 0         | (omitted)           |       |       |                      |           |
| _Istate_26                                         | -.6513403 | .3005277            | -2.17 | 0.030 | -1.240364            | -.0623168 |
| _Istate_27                                         | -.2231925 | .8779522            | -0.25 | 0.799 | -1.943947            | 1.497562  |
| _Istate_28                                         | .2172394  | .3281991            | 0.66  | 0.508 | -.426019             | .8604979  |
| _Istate_29                                         | .2958428  | .4950215            | 0.60  | 0.550 | -.6743815            | 1.266067  |
| _Istate_30                                         | 1.359749  | .2803208            | 4.85  | 0.000 | .8103304             | 1.909168  |
| _Istate_31                                         | -.9976881 | .4238389            | -2.35 | 0.019 | -1.828397            | -.166979  |
| _Istate_32                                         | -.2844545 | .2857023            | -1.00 | 0.319 | -.8444206            | .2755117  |
| _Istate_33                                         | 1.140559  | .2814077            | 4.05  | 0.000 | .5890101             | 1.692108  |
| _Istate_34                                         | -.5227923 | .2888146            | -1.81 | 0.070 | -1.088858            | .0432738  |
| _Istate_35                                         | -1.142743 | .3872752            | -2.95 | 0.003 | -1.901789            | -.3836977 |



|                 |           |           |       |       |           |           |
|-----------------|-----------|-----------|-------|-------|-----------|-----------|
| _Istate_36      | -2.172099 | .7593842  | -2.86 | 0.004 | -3.660465 | -.6837335 |
| _Istate_37      | -.229237  | .2751408  | -0.83 | 0.405 | -.768503  | .310029   |
| _Istate_38      | .3739791  | .3331656  | 1.12  | 0.262 | -.2790134 | 1.026972  |
| _Istate_39      | -.1092626 | .3062767  | -0.36 | 0.721 | -.7095539 | .4910286  |
| _Istate_40      | .1406944  | .4677469  | 0.30  | 0.764 | -.7760727 | 1.057461  |
| _Istate_41      | -1.038566 | .3269634  | -3.18 | 0.001 | -1.679403 | -.3977299 |
| _Istate_42      | -1.335    | .2831058  | -4.72 | 0.000 | -1.889877 | -.7801226 |
| _Istate_43      | -1.026797 | .4728333  | -2.17 | 0.030 | -1.953534 | -.100061  |
| _Istate_44      | -.4249723 | .3415172  | -1.24 | 0.213 | -1.094334 | .2443891  |
| _Istate_45      | 0         | (omitted) |       |       |           |           |
| _Istate_46      | -1.051769 | .483769   | -2.17 | 0.030 | -1.999939 | -.1035992 |
| _Istate_47      | -.1918411 | .3526853  | -0.54 | 0.586 | -.8830915 | .4994093  |
| _Istate_48      | -2.444244 | 1.085676  | -2.25 | 0.024 | -4.57213  | -.3163584 |
| _Istate_49      | -.0928788 | .815384   | -0.11 | 0.909 | -1.691002 | 1.505244  |
| _cons           | -.1351193 | .9293328  | -0.15 | 0.884 | -1.956578 | 1.686339  |
| -----           |           |           |       |       |           |           |
| glm             |           |           |       |       |           |           |
| qrt2_minority   | .1271511  | .1067893  | 1.19  | 0.234 | -.0821521 | .3364543  |
| qrt3_minority   | .0744526  | .1157481  | 0.64  | 0.520 | -.1524095 | .3013146  |
| qrt4_minority   | .1809328  | .1344898  | 1.35  | 0.179 | -.0826623 | .4445279  |
| beds            | .002283   | .0015399  | 1.48  | 0.138 | -.0007351 | .0053012  |
| num_resident    | -.0058713 | .0017673  | -3.32 | 0.001 | -.0093351 | -.0024076 |
| nfp             | .1252861  | .0855568  | 1.46  | 0.143 | -.0424022 | .2929744  |
| gov             | .0194353  | .2341667  | 0.08  | 0.934 | -.439523  | .4783935  |
| chain           | -.0636684 | .066829   | -0.95 | 0.341 | -.1946507 | .067314   |
| _Ihosbase_2     | -.5375946 | .1754244  | -3.06 | 0.002 | -.8814201 | -.1937692 |
| pctmcaid        | .0051149  | .00193    | 2.65  | 0.008 | .0013321  | .0088976  |
| pctmcare        | .0066451  | .0034653  | 1.92  | 0.055 | -.0001467 | .0134369  |
| avg_casemix     | .1127841  | .2506125  | 0.45  | 0.653 | -.3784074 | .6039756  |
| rn_hprd         | .0538452  | .1789289  | 0.30  | 0.763 | -.296849  | .4045394  |
| total_hprd      | -.0006815 | .0739939  | -0.01 | 0.993 | -.1457069 | .1443438  |
| overall         | -.0208457 | .0258279  | -0.81 | 0.420 | -.0714674 | .0297761  |
| cnty_casek_nonh | .0037981  | .0012784  | 2.97  | 0.003 | .0012924  | .0063038  |
| tot_pop_100k    | -.0039853 | .0026211  | -1.52 | 0.128 | -.0091226 | .001152   |
| pct_65          | -.0074603 | .0104135  | -0.72 | 0.474 | -.0278704 | .0129499  |
| med_inc_k       | -.0007384 | .0025316  | -0.29 | 0.771 | -.0057004 | .0042235  |
| pct_hs          | -.0300704 | .0110126  | -2.73 | 0.006 | -.0516547 | -.0084862 |
| competition     | .0001972  | .0024329  | 0.08  | 0.935 | -.0045713 | .0049657  |
| _Istate_2       | .703466   | .4676058  | 1.50  | 0.132 | -.2130244 | 1.619957  |
| _Istate_3       | .4926112  | .3716399  | 1.33  | 0.185 | -.2357895 | 1.221012  |
| _Istate_4       | .1027107  | .2866873  | 0.36  | 0.720 | -.4591861 | .6646076  |
| _Istate_5       | .5681595  | .3080941  | 1.84  | 0.065 | -.0356938 | 1.172013  |
| _Istate_6       | .3576698  | .314296   | 1.14  | 0.255 | -.258339  | .9736785  |
| _Istate_7       | .1167189  | .2837082  | 0.41  | 0.681 | -.4393389 | .6727766  |
| _Istate_8       | .2340799  | .2702309  | 0.87  | 0.386 | -.295563  | .7637227  |
| _Istate_9       | .2782053  | .3093903  | 0.90  | 0.369 | -.3281886 | .8845992  |
| _Istate_10      | 0         | (omitted) |       |       |           |           |
| _Istate_11      | .699924   | .3877209  | 1.81  | 0.071 | -.0599951 | 1.459843  |
| _Istate_12      | -.0287617 | .2976134  | -0.10 | 0.923 | -.6120733 | .5545498  |
| _Istate_13      | .1559845  | .3366397  | 0.46  | 0.643 | -.5038172 | .8157862  |
| _Istate_14      | .3187819  | .3652458  | 0.87  | 0.383 | -.3970867 | 1.03465   |
| _Istate_15      | .7574329  | .6953057  | 1.09  | 0.276 | -.6053412 | 2.120207  |
| _Istate_16      | .474547   | .3301733  | 1.44  | 0.151 | -.1725808 | 1.121675  |
| _Istate_17      | .2661892  | .3562355  | 0.75  | 0.455 | -.4320195 | .9643979  |
| _Istate_18      | .1311835  | .2791263  | 0.47  | 0.638 | -.415894  | .6782609  |
| _Istate_19      | .5391871  | .3131033  | 1.72  | 0.085 | -.0744841 | 1.152858  |
| _Istate_20      | .3873243  | .4168191  | 0.93  | 0.353 | -.4296262 | 1.204275  |
| _Istate_21      | .9905984  | .2588116  | 3.83  | 0.000 | .483337   | 1.49786   |
| _Istate_22      | .2563153  | .2645631  | 0.97  | 0.333 | -.2622189 | .7748495  |
| _Istate_23      | .3955305  | .3924547  | 1.01  | 0.314 | -.3736665 | 1.164728  |
| _Istate_24      | .3762181  | .3034443  | 1.24  | 0.215 | -.2185217 | .9709579  |

|            |  |           |           |       |       |           |           |
|------------|--|-----------|-----------|-------|-------|-----------|-----------|
| _Istate_25 |  | 0         | (omitted) |       |       |           |           |
| _Istate_26 |  | .0781923  | .3189323  | 0.25  | 0.806 | -.5469036 | .7032881  |
| _Istate_27 |  | .5653915  | .2605682  | 2.17  | 0.030 | .0546872  | 1.076096  |
| _Istate_28 |  | .0873835  | .308339   | 0.28  | 0.777 | -.5169499 | .6917169  |
| _Istate_29 |  | .5859236  | .3179811  | 1.84  | 0.065 | -.0373079 | 1.209155  |
| _Istate_30 |  | .4930913  | .2631986  | 1.87  | 0.061 | -.0227685 | 1.008951  |
| _Istate_31 |  | -.1485744 | .3527316  | -0.42 | 0.674 | -.8399156 | .5427669  |
| _Istate_32 |  | -.3672813 | .2459744  | -1.49 | 0.135 | -.8493822 | .1148197  |
| _Istate_33 |  | .5282944  | .2752602  | 1.92  | 0.055 | -.0112056 | 1.067794  |
| _Istate_34 |  | .531      | .2879387  | 1.84  | 0.065 | -.0333495 | 1.095349  |
| _Istate_35 |  | -.6348931 | .2660759  | -2.39 | 0.017 | -1.156392 | -.1133939 |
| _Istate_36 |  | -.4130505 | .2407237  | -1.72 | 0.086 | -.8848603 | .0587594  |
| _Istate_37 |  | .2562138  | .2809949  | 0.91  | 0.362 | -.2945261 | .8069537  |
| _Istate_38 |  | .1262308  | .3057672  | 0.41  | 0.680 | -.4730618 | .7255235  |
| _Istate_39 |  | .052079   | .3030863  | 0.17  | 0.864 | -.5419593 | .6461172  |
| _Istate_40 |  | .4211086  | .5673478  | 0.74  | 0.458 | -.6908727 | 1.53309   |
| _Istate_41 |  | -.172452  | .3752194  | -0.46 | 0.646 | -.9078685 | .5629645  |
| _Istate_42 |  | -.1065343 | .2954745  | -0.36 | 0.718 | -.6856538 | .4725851  |
| _Istate_43 |  | 1.043252  | .5728851  | 1.82  | 0.069 | -.0795818 | 2.166086  |
| _Istate_44 |  | .3520297  | .2974861  | 1.18  | 0.237 | -.2310324 | .9350918  |
| _Istate_45 |  | 0         | (omitted) |       |       |           |           |
| _Istate_46 |  | 1.137133  | .3986234  | 2.85  | 0.004 | .3558454  | 1.918421  |
| _Istate_47 |  | .1854963  | .3058493  | 0.61  | 0.544 | -.4139573 | .7849499  |
| _Istate_48 |  | -.5348712 | .2642542  | -2.02 | 0.043 | -1.0528   | -.0169426 |
| _Istate_49 |  | -.1551573 | .3435228  | -0.45 | 0.652 | -.8284496 | .518135   |
| _cons      |  | -1.143361 | 1.069975  | -1.07 | 0.285 | -3.240473 | .9537505  |

-----
